# Supplementary material for: Unprecedented bilayer topologies in 5- and 6-connected framework polymers
Source: Royal Society of Chemistry journal article supplement (doi:10.1039/b407554d), 2004-01-01
Supplement: b407554d.pdf [file b407554d.pdf]

## SUPPLEMENTARY MATERIAL

The decoration of each of the double layered 6-connected networks is unimportant in the determination of topology but can be seen as completing the co-ordination sphere in **2**, expanding the structure to accommodate anions in **3** or accommodating extra ligands in **4**. In **2** the triflate anions occupy the free space between the 4<sup>4</sup> nets of a single bilayer. In **3** the iodide ions occupy space both within a bilayer and between adjacent bilayers. The large volume within the framework of **4** accommodates not only ClO<sub>4</sub><sup>-</sup> anions but also one molecule of chlorobenzene and one CH<sub>3</sub>OH molecule per metal centre.

### Crystallographic Data

Crystal data for **1**: C<sub>20</sub>H<sub>16</sub>LaN<sub>7</sub>O<sub>13</sub>, *M* = 701.31, monoclinic, space group *C2/c*, *a*=27.008(8) Å, *b*=13.389(4) Å, *c*=13.982(3) Å, *β* = 106.29(2)°, *U*=4853(2) Å<sup>3</sup>, *Z*=8, *D<sub>c</sub>*=1.920 Mg/m<sup>3</sup>, *μ*(Mo-Kα)=1.846 mm<sup>-1</sup>, *T* = 298(2) K. 4771 unique reflections (*R*<sub>int</sub> = 0.026). Final *R*<sub>1</sub> [4122 *I* > 2σ(*I*)] = 0.0292, *wR*<sub>2</sub> (all data) = 0.0634.

Crystal data for **2**: C<sub>33</sub>H<sub>24</sub>F<sub>9</sub>N<sub>6</sub>O<sub>17</sub>S<sub>3</sub>Yb, *M*=1216.8, orthorhombic, space group *Pcca* (No. 54), *a*=16.794(3) Å, *b*=13.764(3) Å, *c*=20.044(4) Å, *U*=4633.4(14) Å<sup>3</sup>, *Z*=4, *D<sub>c</sub>*=1.744 Mg/m<sup>3</sup>, *μ*(Mo-Kα)=2.264 mm<sup>-1</sup>, *T* = 150(2) K. 5345 unique reflections (*R*<sub>int</sub> = 0.074). Final *R*<sub>1</sub> [3592 *I* > 2σ(*I*)] = 0.0965, *wR*<sub>2</sub> (all data) = 0.249.

Crystal data for **3**: C<sub>56</sub>H<sub>44</sub>ErI<sub>9</sub>N<sub>11</sub>O<sub>13</sub>, *M*=2388.4, orthorhombic, space group *Pbcn*, *a*=43.203(8) Å, *b*=19.244(4) Å, *c*=17.167(3) Å, *U*=14274(8) Å<sup>3</sup>, *Z*=8, *D<sub>c</sub>* = 2.223 Mg/m<sup>3</sup>, *μ*(Mo-Kα) = 5.13 mm<sup>-1</sup>, *T* = 150(2) K. 15426 unique reflections (*R*<sub>int</sub> = 0.046). Final *R*<sub>1</sub> [14261 *I* > 2σ(*I*)] = 0.079, *wR*<sub>2</sub> (all data) = 0.169.

Crystal data for **4**: C<sub>47</sub>H<sub>41</sub>Cl<sub>4</sub>LaN<sub>8</sub>O<sub>21</sub>, *M* = 1334.59, monoclinic, space group *P2<sub>1</sub>/n*, *a* = 16.6846(8) Å, *b* = 19.8749(9) Å, *c* = 32.669(2) Å, *β* = 100.664(2)°, *U* = 10646(2) Å<sup>3</sup>, *Z* = 8, *D<sub>c</sub>* = 1.665 Mg/m<sup>3</sup>, *μ*(Mo-Kα) = 1.091 mm<sup>-1</sup>, *T* = 150(2) K. 20663 unique reflections (*R*<sub>int</sub> = 0.118). Final *R*<sub>1</sub> [13088 *I* > 2σ(*I*)] = 0.059, *wR*<sub>2</sub> (all data) = 0.195.

# Supplementary Material (ESI) for Chemical Communications

# This journal is © The Royal Society of Chemistry 2004

Crystal data for **5**:  $C_{86.7}H_{91.8}B_2LaN_5O_{11.7}$   $M = 1551.58$ , monoclinic, space group  $C2/c$ ,  $a = 49.269(7)$  Å,  $b = 17.698(3)$  Å,  $c = 18.718(3)$  Å,  $\beta = 105.946(3)^\circ$   $U = 15693(3)$  Å<sup>3</sup>,  $Z = 8$   $D_c = 1.313$  Mg/m<sup>3</sup>,  $\mu(\text{Mo-K}\alpha) = 0.609$  mm<sup>-1</sup>,  $T = 150(2)$  K, 15221 unique reflections ( $R_{\text{int}} = 0.045$ ). Final  $R_1$  [ $9822 I > 2\sigma(I)$ ] = 0.068,  $wR2$  (all data) = 0.208.

### Synthesis of **1 - 5**

Preparation of  $\{\text{La(L)}_2(\text{NO}_3)_3\}_\infty$  **1**:

A solution of L (22 mg, 0.10 mmol) in MeOH (6cm<sup>3</sup>) was carefully mixed with a solution of  $\text{La}(\text{NO}_3)_3 \cdot 6\text{H}_2\text{O}$  (22 mg, 0.05mmol) in MeOH (6 cm<sup>3</sup>). The reaction yielded a pale yellow crystalline product after several hours. Elemental analysis calcd (%) for  $C_{20}H_{16}LaN_7O_{13}$ : C 34.25, H 2.30, N 13.98; found 34.09, H 2.17, N 13.74.

Preparation of  $\{\text{Yb(L)}_3(\text{CF}_3\text{SO}_3)_3\}_\infty$  **2**:

$\text{Yb}(\text{CF}_3\text{SO}_3)_3 \cdot x\text{H}_2\text{O}$  (31.8mg, 0.05mmol) was covered with  $\text{CHCl}_3$  (5 cm<sup>3</sup>) on top of which a solution of L (10mg, 0.05mmol) in MeOH (10 cm<sup>3</sup>) was layered. Colourless square plate shaped crystals appeared over a period of 1 week. Elemental analysis calcd (%) for  $C_{33}H_{24}F_9N_6O_{17}S_3\text{Yb}$ : C 36.07, H 2.20, N 21.67; found C 35.16, H 2.52, N 20.41.

Preparation of  $\{\text{Er(L)}_5(\text{I}_3)_3(\text{L})_{0.5}(\text{MeOH})\}_\infty$ , **3**:

$\text{ErCl}_3$  (6mg, 0.013mmol),  $\text{I}_2$  (16.5mg, 0.065mmol) and NaI (1.8mg, 0.012mmol) was dissolved in MeOH (10 cm<sup>3</sup>), to which a solution of L (10mg, 0.05mmol) in MeOH (10 cm<sup>3</sup>) was added. Dark red lath shaped crystals appeared over a period of 48h. Elemental analysis calcd (%) for  $C_{56}H_{43}\text{ErI}_9\text{N}_{11}\text{O}_{13}$ : C 28.16, H 1.86, N 6.45; found C 27.76; H 1.96; N 6.06.

Preparation of  $[\text{La(L)}_4](\text{ClO}_4)_3 \cdot \text{C}_6\text{H}_5\text{Cl} \cdot \text{CH}_3\text{OH}$ , **4**:

$\text{La}(\text{ClO}_4)_3 \cdot x\text{H}_2\text{O}$  (45 mg, 0.1 mmol) was covered with chlorobenzene (10 cm<sup>3</sup>), on which a solution of L (59 mg, 0.3 mmol) in MeOH (10 cm<sup>3</sup>) was layered. Colourless crystals appeared at on the wall of the

# Supplementary Material (ESI) for Chemical Communications

# This journal is © The Royal Society of Chemistry 2004

vessel over a period of a week. Elemental analysis calcd (%) for  $C_{47}H_{41}Cl_4LaN_8O_{21}$ : C 42.30, H 3.10, N 8.40; found C 42.23, H 3.15, N 8.75.

Preparation of  $[La(L)_{2.5}(CH_3OH)_2(C_7H_{11}CH_2CO_2)](BPh_4)_2 \cdot 2.7CH_3OH$  **5**:

Lanthanum chloride hydrate (18 mg, 0.05 mmol) in methanol (5 cm<sup>3</sup>) was added to a solution of 2-norbornyl acetic acid (8 mg, 0.05 mmol) and NaOMe (3 mg, 0.05 mmol) in MeOH (5 cm<sup>3</sup>). To this solution was then added firstly a solution of sodium tetraphenylborate (51 mg, 0.15 mmol) in MeOH (5 cm<sup>3</sup>) and secondly a solution of L (33 mg, 0.15 mmol) in MeOH (5 cm<sup>3</sup>). The resultant white emulsion-like precipitate slowly transformed to a light yellow crystalline product in *ca.* 3 days. Yield: 47 mg (59%); anal. calcd for  $C_{86.7}H_{91.8}B_2LaN_5O_{11.7}$ : C 67.11, H 5.96, N 4.51; Found: C 65.80, H 5.60, N 4.52. Elemental and powder diffraction analysis indicates possible impurities of other yet unidentified products.

Supplementary Figures

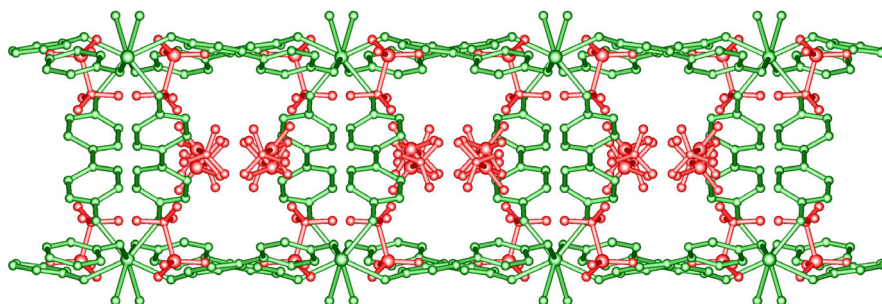

Supplementary Figure 1: Full structure of **2** showing the positions of the triflate anions (red) within the bi-layer structure (green).

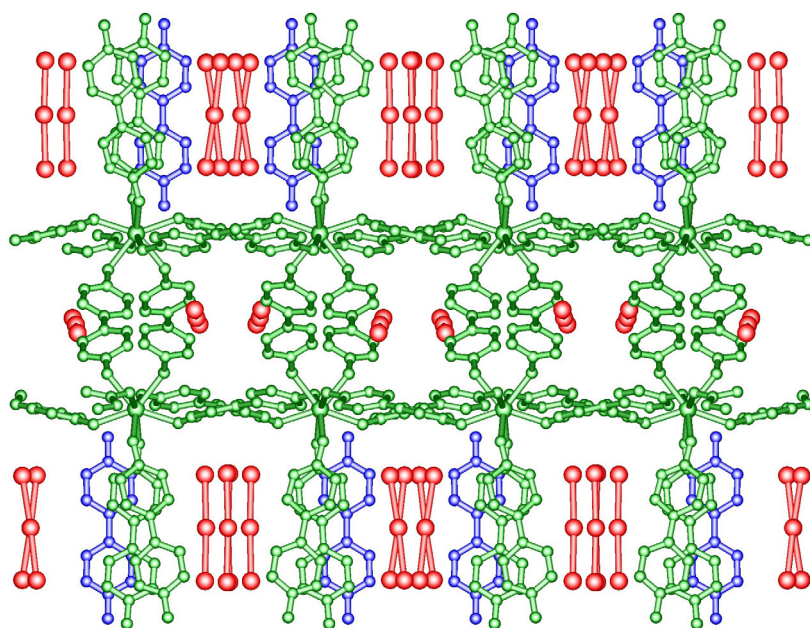

Supplementary Figure 2: Full structure of **3** showing the positions of the iodide anions (red), the bi-layer structure (green) and the non-co-ordinating ligands (blue).

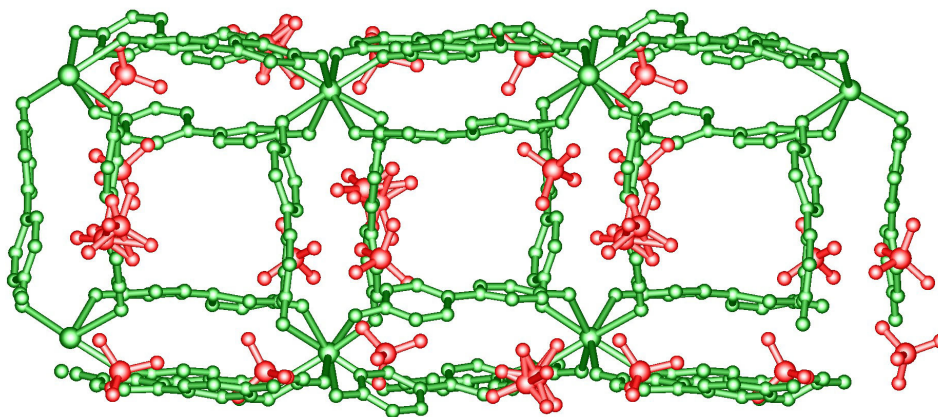

Supplementary Figure 3: View of the full structure of **4** positions of the perchlorate anions (red) within the bilayer structure (green).

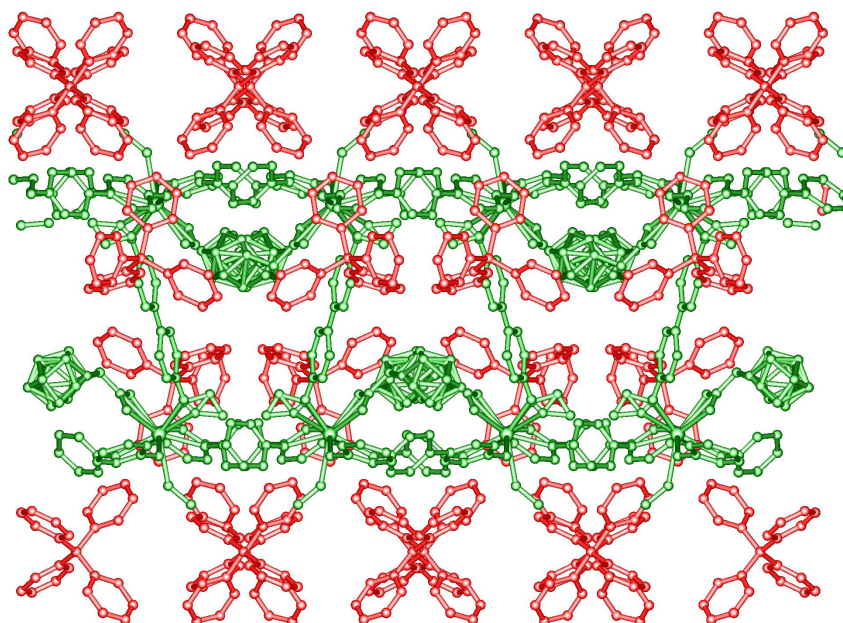

Supplementary Figure 4: Full structure of **5** showing the position of the tetraphenylborate anions (red) and the bi-layer structure (green).

# Supplementary Material (ESI) for Chemical Communications

# This journal is © The Royal Society of Chemistry 2004
